# Diabetic Patients with Severe Sepsis Admitted to Intensive Care Unit Do Not Fare Worse than Non-Diabetic Patients: A Nationwide Population-Based Cohort Study

Cheng-Wei Chang<sup>1,3\*</sup>, Victor C. Kok<sup>2,3\*</sup>, Ta-Chien Tseng<sup>4</sup>, Jorng-Tzong Horng<sup>2,5</sup>, Chun-Eng Liu<sup>6</sup>

**1** Department of Information Management, Hsing Wu University, New Taipei City, Taiwan, **2** Public Health and Clinical Informatics Research Group, Department of Biomedical Informatics, Asia University Taiwan, Taichung, Taiwan, **3** Division of Medical Oncology, Department of Internal Medicine, Kuang Tien General Hospital, Taichung, Taiwan, **4** Bioinformatics Center, National Cheng Kung University, Tainan, Taiwan, **5** Department of Computer Science and Information Engineering, National Central University, Chungli, Taiwan, **6** Division of Infectious Diseases, Department of Internal Medicine, Changhua Christian Hospital, Changhua, Taiwan

## Abstract

**Background:** We sought to examine whether type 2 diabetes increases the risk of acute organ dysfunction and of hospital mortality following severe sepsis that requires admission to an intensive care unit (ICU).

**Methods:** Nationwide population-based retrospective cohort study of 16,497 subjects with severe sepsis who had been admitted for the first time to an ICU during the period of 1998–2008. A diabetic cohort (n = 4573) and a non-diabetic cohort (n = 11924) were then created. Relative risk (RR) of organ dysfunctions, length of hospital stay (LOS), 90-days hospital mortality, ICU resource utilization and hazard ratio (HR) of mortality adjusted for age, gender, Charlson-Deyo comorbidity index score, surgical condition and number of acute organ dysfunction, were compared across patients with severe sepsis with or without diabetes.

**Results:** Diabetic patients with sepsis had a higher risk of developing acute kidney injury (RR, 1.54; 95% confidence interval (CI), 1.44–1.63) and were more likely to be undergoing hemodialysis (15.55% vs. 7.24%) in the ICU. However, the diabetic cohort had a lower risk of developing acute respiratory dysfunction (RR = 0.96, 0.94–0.97), hematological dysfunction (RR = 0.70, 0.56–0.89), and hepatic dysfunction (RR = 0.77, 0.63–0.93). In terms of adjusted HR for 90-days hospital mortality, the diabetic patients with severe sepsis did not fare significantly worse when afflicted with cardiovascular, respiratory, hepatic, renal and/or neurologic organ dysfunction and by numbers of organ dysfunction. There was no statistically significant difference in LOS between the two cohorts (median 17 vs. 16 days, interquartile range (IQR) 8–30 days,  $p = 0.11$ ). Multiple logistic regression analysis to predict the occurrence of mortality shows that being diabetic was not a predictive factor with an odds ratio of 0.972, 95% CI 0.890–1.061,  $p = 0.5203$ .

**Interpretation:** This large nationwide population-based cohort study suggests that diabetic patients do not fare worse than non-diabetic patients when suffering from severe sepsis that requires ICU admission.

**Citation:** Chang C-W, Kok VC, Tseng T-C, Horng J-T, Liu C-E (2012) Diabetic Patients with Severe Sepsis Admitted to Intensive Care Unit Do Not Fare Worse than Non-Diabetic Patients: A Nationwide Population-Based Cohort Study. PLoS ONE 7(12): e50729. doi:10.1371/journal.pone.0050729

**Editor:** Antonio Carlos Seguro, University of São Paulo School of Medicine, Brazil

**Received:** August 16, 2012; **Accepted:** October 24, 2012; **Published:** December 7, 2012

**Copyright:** © 2012 Chang et al. This is an open-access article distributed under the terms of the Creative Commons Attribution License, which permits unrestricted use, distribution, and reproduction in any medium, provided the original author and source are credited.

**Funding:** This work was partially supported by the National Science Council of the Republic of China under contract number NSC 101-2221-E-266-005. The funders had no role in study design, data collection and analysis, decision to publish, or preparation of the manuscript. No additional external funding was received for this study

**Competing Interests:** The authors have declared that no competing interests exist.

\* E-mail: victorkok@live.asia.edu.tw

These authors contributed equally to this work.

## Introduction

Severe sepsis, defined as deregulation of the inflammatory response to a documented infection complicated by acute organ dysfunction, causes substantial healthcare burdens and is a leading cause of death. Sepsis complicated by acute organ dysfunction accounts for almost half of intensive care unit (ICU) resource utilization and is associated with a higher morbidity and mortality than sepsis without acute organ dysfunction [1,2]. Globally the mortality rate of severe sepsis ranges from 28.6% to 49.6% [1,3].

Various risk factors, such as advanced age, chronic alcoholism and an immunosuppressed state, impact negatively on the treatment outcome of severe sepsis [1,2,4,5]. Nevertheless, there is still conflicting data on whether diabetes mellitus is a negative determinant in relation to the outcome of severe sepsis [6,7,8,9].

Diabetes mellitus is considered an immunosuppressed state [10]. Diabetic patients are particularly prone to endothelial dysfunction during sepsis. A recent study has shown that E-selectin, a soluble leucocyte adhesion molecule, and sFLT-1, a VEGF receptor, are

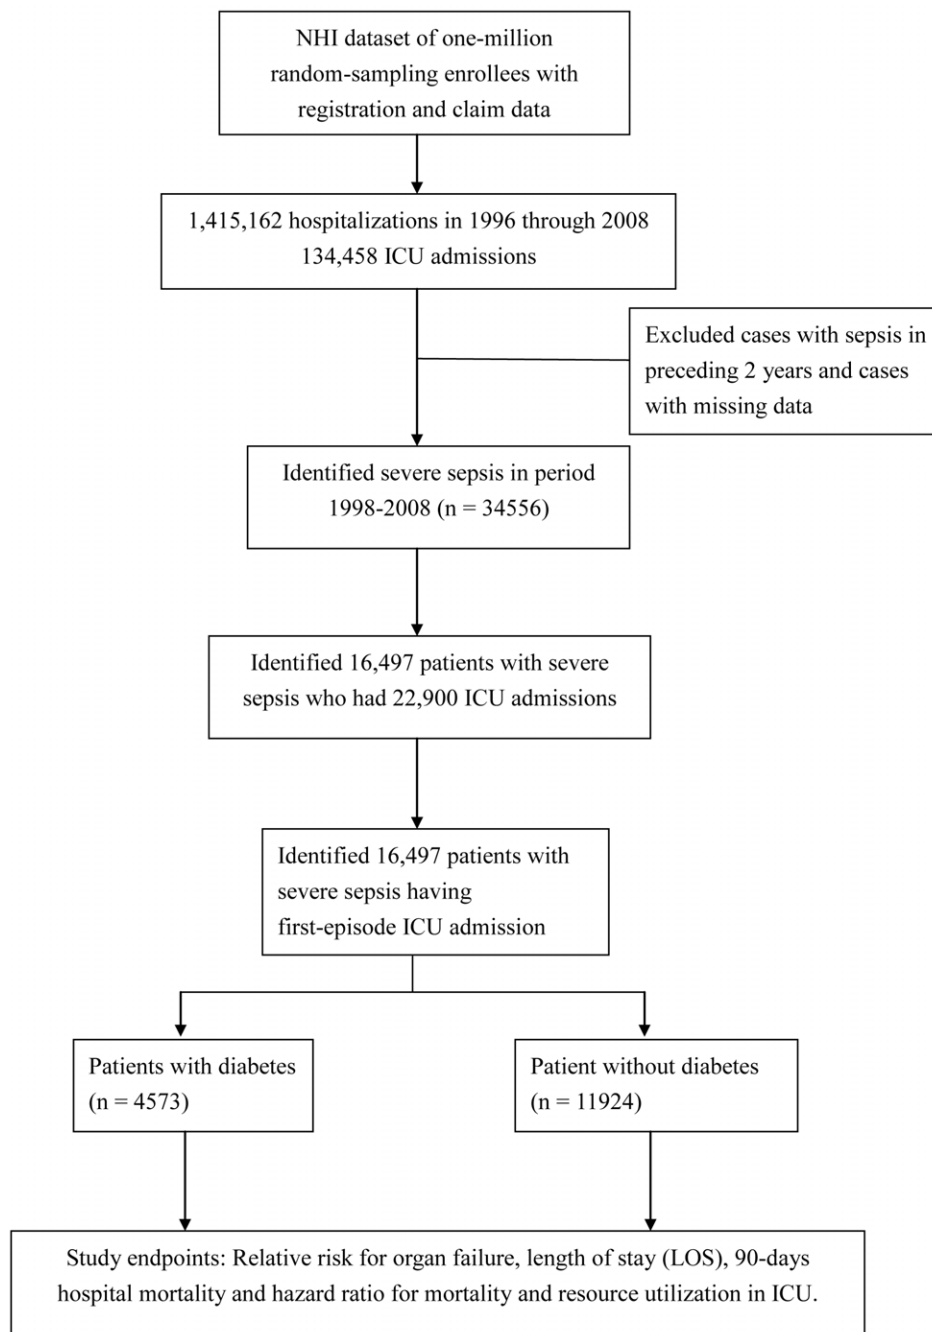

**Figure 1. The Study Flowchart.**  
doi:10.1371/journal.pone.0050729.g001

significantly increased in diabetic patients compared with patients without diabetes during the most severe stages of sepsis; this suggests that patients with diabetes show a more pronounced activation of some endothelial pathways during sepsis, particularly during severe sepsis [11,12]. The presence of diabetes mellitus seems to affect the already compromised red blood cell deformability of septic patients, probably leading to a further impairment of microcirculatory functionality in these patients [13].

A review of the literature on the effect of diabetes in relation to the outcome of severe sepsis or infection shows inconsistent results [6,7,8,9,13,14,15,16,17,18,19]. Thus, the magnitude of the effect

of diabetes on the risk of organ failure and hospital mortality among patients with severe sepsis remains an active question. Therefore we sought to examine whether type 2 diabetes increases the risk of organ dysfunction and the risk of death following severe sepsis that required admission to an intensive care unit (ICU) using a nationwide population-based retrospective prospective study design. Relative risk (RR) for various organ dysfunctions, the length of hospital stay (LOS), the 90-days hospital mortality, ICU resource utilization and the hazard ratio (HR) for mortality were compared among patients with severe sepsis with or without diabetes.

**Table 1.** Demographic characteristics and clinical features of patients with severe sepsis in their first-episode ICU admission.

|                                                          | Severe sepsis with first-episode ICU admission |         |                    |         | P-value               |
|----------------------------------------------------------|------------------------------------------------|---------|--------------------|---------|-----------------------|
|                                                          | DM (n = 4573)                                  |         | Non-DM (n = 11924) |         |                       |
| Age group\mean                                           | 71.63                                          |         | 67.57              |         | <0.0001               |
| <50                                                      | 216                                            | 4.72%   | 2062               | 17.29%  |                       |
| 50–60                                                    | 477                                            | 10.43%  | 1120               | 9.39%   |                       |
| 60–70                                                    | 996                                            | 21.78%  | 1642               | 13.77%  |                       |
| 70–80                                                    | 1663                                           | 36.37%  | 3333               | 27.95%  |                       |
| >80                                                      | 1221                                           | 26.70%  | 3767               | 31.59%  |                       |
| Gender: male                                             | 2462                                           | 53.84%  | 7651               | 64.16%  | <0.0001               |
| Surgical condition                                       | 1243                                           | 27.18%  | 3172               | 26.60%  | 0.4554                |
| Charlson-Deyo comorbidity index (CCI) score <sup>†</sup> | 2.13                                           |         | 1.98               |         | >0.9999 <sup>††</sup> |
| CCI Low (0–2)                                            | 2775                                           | 60.68%  | 7824               | 65.62%  | 0.4 <sup>††</sup>     |
| CCI moderate (3–4)                                       | 1025                                           | 22.41%  | 2505               | 21.01%  |                       |
| CCI high (≥5)                                            | 773                                            | 16.90%  | 1595               | 13.38%  |                       |
| Malignant neoplasm                                       | 669                                            | 14.63%  | 1723               | 14.45%  | 0.7884                |
| Number of infections by site                             |                                                |         |                    |         |                       |
| Respiratory                                              | 1991                                           | 43.54%  | 5166               | 43.32%  | 0.806                 |
| Genitourinary                                            | 1193                                           | 26.09%  | 1938               | 16.25%  | <0.0001               |
| Skin, soft tissue, or bone                               | 872                                            | 19.07%  | 1431               | 12.00%  | <0.0001               |
| Gastrointestinal                                         | 1579                                           | 34.53%  | 3885               | 32.58%  | 0.018                 |
| Central nervous system                                   | 47                                             | 1.03%   | 140                | 1.17%   | 0.4603                |
| Cardiovascular                                           | 20                                             | 0.44%   | 71                 | 0.60%   | 0.2417                |
| Others                                                   | 228                                            | 4.99%   | 451                | 3.78%   | 0.0005                |
|                                                          |                                                | 129.67% |                    | 109.71% |                       |

DM: Diabetes Mellitus, CCI: Charlson-Deyo Comorbidity Index,  
<sup>†</sup>To avoid double-counting, diabetes mellitus was excluded from the CCI score in the diabetic cohort.  
<sup>††</sup>Mann-Whitney U test.  
 doi:10.1371/journal.pone.0050729.t001

**Subjects and Methods**

**Data Sources**

This study was designed as a population-based retrospective prospective study using the Taiwan National Health Insurance Research Database (NHIRD). The Taiwan National Health

Insurance (NHI) program started in March 1, 1995. As at 2007, 98.4% of Taiwan’s population of 22.96 million individuals was enrolled in this program. The NHIRD contains a number of large computerized databases that include registration files and original data on claims’ reimbursement; these are derived from the insurance system held by the Bureau of National Health

**Table 2.** Outcomes of acute organ dysfunction(s) and 90-days in-hospital mortality rate in patients with severe sepsis by diabetes mellitus status.

|                         | Severe sepsis with ICU admission (N = 16497) |        |                              |        | Relative risk (95% CI) |
|-------------------------|----------------------------------------------|--------|------------------------------|--------|------------------------|
|                         | With diabetes (n = 4573)                     |        | Without diabetes (n = 11924) |        |                        |
| Acute Organ Dysfunction |                                              |        |                              |        |                        |
| Respiratory             | 3542                                         | 77.45% | 9649                         | 80.92% | 0.96 (0.94–0.97)*      |
| Cardiovascular          | 1309                                         | 28.62% | 3488                         | 29.25% | 0.98 (0.93–1.03)       |
| Hematologic             | 90                                           | 1.97%  | 333                          | 2.79%  | 0.70 (0.56–0.89)*      |
| Hepatic                 | 126                                          | 2.76%  | 428                          | 3.59%  | 0.77 (0.63–0.93)*      |
| Kidney                  | 1241                                         | 27.14% | 2108                         | 17.68% | 1.54 (1.44–1.63)*      |
| Neurological            | 173                                          | 3.78%  | 418                          | 3.51%  | 1.08 (0.91–1.28)       |
| Hospital Mortality      | 1034                                         | 22.61% | 2694                         | 22.59% | 1.00 (0.94–1.07)       |

\*statistically significant.  
 doi:10.1371/journal.pone.0050729.t002

**Table 3.** Cox proportional hazard model assessing the effect of diabetes on 90-days hospital mortality in patients with severe sepsis having at least one organ dysfunction in their first-episode ICU admission.

| Organ failure             | 90-days hospital mortality rate (%) |        | Hazard Ratio (95% CI) | Adjusted <sup>a</sup> Hazard Ratio (95% CI) |
|---------------------------|-------------------------------------|--------|-----------------------|---------------------------------------------|
|                           | DM                                  | non-DM |                       |                                             |
| Cardiovascular            | 30.48%                              | 31.88% | 0.946 (0.844–1.061)   | 0.952 (0.848–1.067)                         |
| Respiratory               | 24.65%                              | 23.51% | 1.054 (0.975–1.140)   | 1.020 (0.942–1.105)                         |
| Hematologic               | 35.56%                              | 28.53% | 1.357 (0.909–2.025)   | 1.558 (1.010–2.402)*                        |
| Hepatic                   | 23.01%                              | 22.66% | 1.002 (0.662–1.517)   | 1.008 (0.654–1.552)                         |
| Kidney                    | 23.61%                              | 28.56% | 0.795 (0.691–0.914)** | 0.871 (0.754–1.005)                         |
| Neurologic                | 15.61%                              | 18.66% | 0.837 (0.540–1.297)   | 0.763 (0.473–1.231)                         |
| Overall organ dysfunction | 21.67%                              | 21.91% | 0.986 (0.917–1.061)   | 0.979 (0.908–1.055)                         |
| Single organ dysfunction  | 15.56%                              | 15.58% | 0.998 (0.897–1.111)   | 1.001 (0.898–1.117)                         |
| Two organ dysfunction     | 30.01%                              | 33.37% | 0.879 (0.784–0.986) * | 0.929 (0.825–1.045)                         |
| ≥3 organ dysfunction      | 44.00%                              | 42.07% | 1.035 (0.843–1.270)   | 1.086 (0.879–1.342)                         |

CI: confidence interval; DM: diabetes mellitus; ICU: intensive care unit.

<sup>a</sup>Adjustment was made for age group, gender, Charlson-Deyo co-morbidity index, surgical condition, number of acute organ dysfunction. To avoid double-counting, diabetes mellitus was excluded from the CCI score in the diabetic cohort.

\*P-value<0.05;

\*\*P-value<0.01.

doi:10.1371/journal.pone.0050729.t003

Insurance. These databases are maintained by the National Health Research Institutes (NHRI), Taiwan and are provided to researchers for academic research purposes. The databases of the NHIRD consists of four main databases: the ambulatory expenditures by visit file, the details of ambulatory care orders file, the inpatient expenditures by admission file and the details of inpatient orders file. These data files are de-identified by scrambling the identification codes of both the individuals and medical facilities; information on individuals is then sent to the National Health Research Institutes and forms the original files of the NHIRD, which has become one of the largest and most comprehensive population-based databases in the world. This data is generally regarded as very accurate and complete [20,21,22,23].

The present study data were retrieved from a one million randomly-sampled enrollee dataset from the mother NHIRD. This consisted of 1 million randomly selected subjects that represent about 4.5% of Taiwanese population from the entire NHI enrollee profile. There were no significant differences in age and sex between the 1 million random sampling dataset and the mother NHI research database [24].

We utilized the databases for patients' demographics including encrypted identification number, gender, date of birth and death, dates of admission and discharge, diagnostic data and procedures (up to five) and discharge status (recovered, died or transferred out). The diagnostic data included date of initial diagnosis, specific treatment items, date of medical treatment, the relevant International Classification of Diseases, Ninth Revision, Clinical Modification (ICD-9-CM) diagnosis codes (up to five), and drug codes.

### Ethics Statement

This study utilized the Taiwan National Health Insurance Research Database (NHIRD) which is provided to researchers for academic research purposes. The data files are de-identified by scrambling the identification codes of both the individuals and medical facilities. This study adhered to strict confidentiality guidelines that are in accordance with the regulations regarding personal electronic data protection. As the data files consist of unidentified secondary data, the study was exempted from a full

review by the Institutional Review Board. Obtaining informed consent from the study population was not required due to the de-identified data files, the large size of the population and to the part of the population that is unattainable (deceased) by the time of the study.

### Case Selection and Definition

The cases of severe sepsis in this study were newly diagnosed ones that required admission to an intensive care unit (ICU). Severe sepsis was defined as documented infection, either bacterial or fungal, plus at least one acute organ dysfunction using criteria based on the International Classification of Diseases, Ninth Revision, Clinical Modification (*ICD-9-CM*). *ICD-9-CM* codes used to identify a bacterial or fungal Infection were adopted from a published work in the literature [1]. The types of acute organ dysfunction associated with the severe sepsis included acute respiratory organ dysfunction (*ICD-9-CM* 93.90, 96.04, 96.7, 518.81, 518.82, 518.85, 786.09, 799.1); acute cardiovascular organ dysfunction (*ICD-9-CM* 458.0, 458.8, 458.9, 785.5, 785.51, 785.59, 796.3); acute hematologic organ dysfunction (*ICD-9-CM* 286.2, 286.6, 286.9, 287.3–287.5, 790.92); acute hepatic organ dysfunction (*ICD-9-CM* 570, 572.2, 573.3, 573.4); acute kidney injury (*ICD-9-CM* 39.95, 580.x, 584.x, 586) and acute neurological organ dysfunction (*ICD-9-CM* 89.14, 293, 348.1, 348.3, 780.01, 780.09) [1,2,25,26]. In order to fulfill the definition of newly diagnosed sepsis, subjects who had been afflicted with sepsis at any time in the preceding two years were excluded. The definition of diabetes mellitus was that the ICD-9-CM code for diabetes (250.X) was present in Outpatient File at least three times in the year before severe sepsis was diagnosed. This definition and accuracy of diabetes diagnosis were studied in Taiwan: the probability of accurate diagnosis of diabetes among patients with  $\geq 4$  outpatient visits was 99.16 times greater than that of patients with  $\leq 1$  outpatient visit. The probability of accurate diagnosis in patients with  $\geq 1$  hospitalization was 5.26 times that of patients who had not been hospitalized [27,28].

Any comorbid medical conditions were identified using their standard ICD-9-CM codes and were used to calculate cumula-

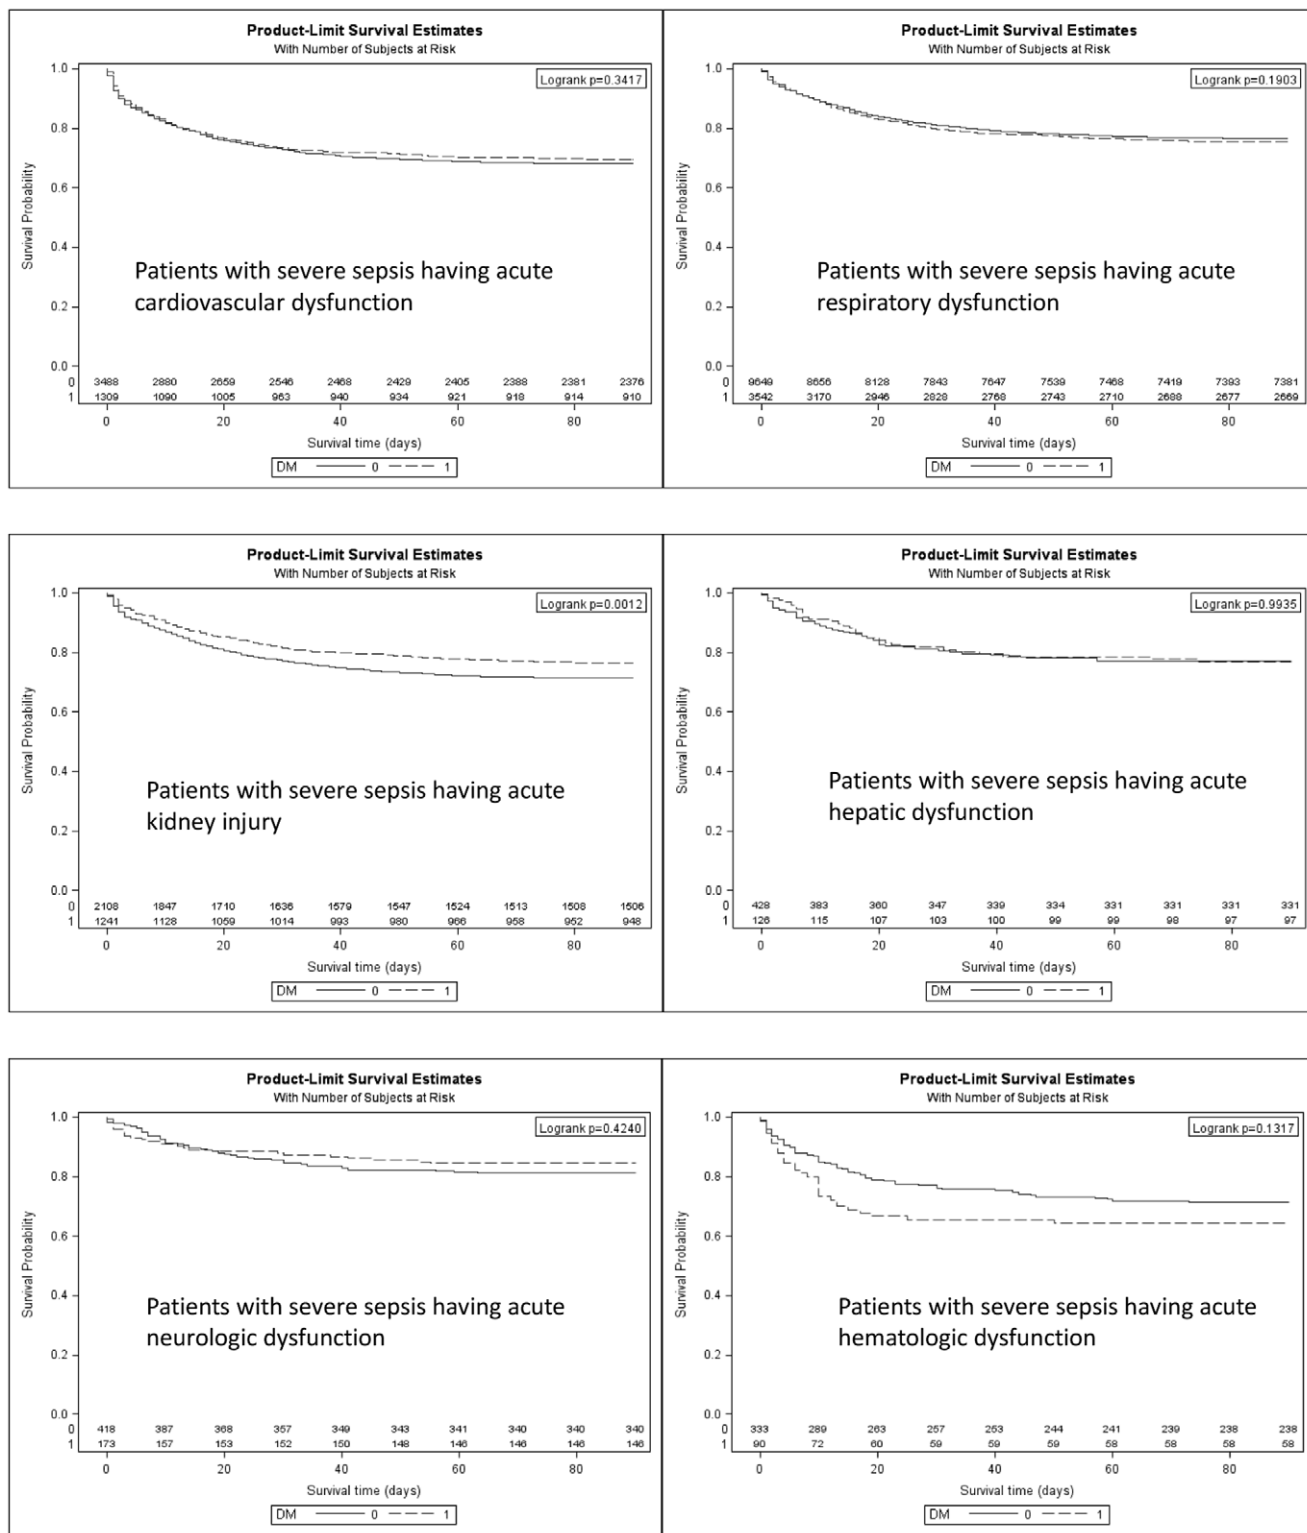

**Figure 2. Kaplan-Meier survival curves in diabetic and non-diabetic patients with severe sepsis shown by type of acute organ dysfunction. Log-rank test was used for comparing their survival.**  
doi:10.1371/journal.pone.0050729.g002

tively the established Charlson-Deyo comorbidity index for each individual. The Charlson-Deyo comorbidity index score, adapted from the Charlson index for use with ICD-9-CM coded administrative databases, contains 17 weighted categories related

to chronic concomitant diseases and is able to predict the subsequent 1-year mortality among inpatients. Each category has a score between 1 and 6 points (1 point for myocardial infarction, congestive heart failure, peripheral vascular disease,

**Table 4.** Total days of stay per ICU hospitalization.

|                           | Severe Sepsis with Diabetes | Severe Sepsis without Diabetes | Difference | P-value* |
|---------------------------|-----------------------------|--------------------------------|------------|----------|
| Mean                      | 23.85                       | 23.72                          |            |          |
| Median                    | 17.00                       | 16.00                          | 1          | 0.11     |
| Standard deviation (SD)   | 33.52                       | 44.93                          |            |          |
| Interquartile Range (IQR) | 8.0–30.0                    | 8.0–30.0                       |            |          |

\*Wilcoxon signed rank test.  
doi:10.1371/journal.pone.0050729.t004

cerebrovascular disease, dementia, chronic pulmonary disease, rheumatological disease, peptic ulcer disease, mild liver disease, and diabetes without organ damage; 2 points for diabetes with organ damage, hemiplegia or paraplegia, severe renal disease, any malignancy including leukemia and lymphoma; 3 points for severe liver disease; 6 points for metastatic solid tumor and HIV infection), and sum of these scores is regarded as a measure of the burden of comorbidity [29,30]. To avoid double-counting, diabetes mellitus was excluded from the CCI score in the diabetic cohort.

Acute organ dysfunction caused by severe sepsis included respiratory dysfunction, cardiovascular dysfunction, renal dysfunction (acute kidney injury), hepatic dysfunction, neurological dysfunction, and hematological dysfunction. The source of infection refers to the anatomic site of the infection, which includes the respiratory tract, the genitourinary tract, the gastrointestinal tract, skin, soft tissue or bone, the central nervous system, the cardiovascular system and others. Surgical conditions

were defined as when a patient has a major surgical procedure other than tracheostomy based on the ICD-9-CM procedure codes.

**Survival Data**

With respect to “discharge status”, the death of a patient was identified when either of two allocations were given in the record, that is either death or “discharged in terminally ill state” which is in Taiwan means that the patient is moribund or near to death. As depicted in the figure 1, the study endpoints for the cohorts studied here are the relative risk of organ dysfunction, the length of hospital stay (LOS), the 90-day hospital mortality and the hazard ratio for death. ICU resource utilization between the two groups was also compared.

**Statistical Analysis**

The SAS statistical package (SAS System for Windows, version 8.2, SAS Institute, Cary, NC, USA) was used for pre-analysis data file merging and other data management before the statistical analysis. The statistical analysis was performed using SPSS software (version 17.0, SPSS Inc., Chicago, Illinois, USA). All statistical tests were two-sided. Values of  $p < 0.05$  were considered statistically significant. The risk of death due to sepsis was evaluated using Cox proportional hazards analysis. Hazard ratios with a 95% confidence interval were calculated.

The distribution of patients and disease characteristics, with or without ICU admission, were compared between patients with and without diabetes, and the differences were examined using the  $\chi^2$  test and the t test, as well as the Mann–Whitney U test (also called the Wilcoxon rank-sum test), which is a non-parametric statistical hypothesis test for assessing whether one of two samples of independent observations tends to have larger values than the other. Categorical variables such as age, sex, surgical condition, underlying comorbidity, infection site, and hospital mortality are reported as percentages. Continuous variables, such as the Charlson-Deyo comorbidity index score and hospital length of stay, are reported as means and medians. The StatsDirect statistical software (StatsDirect Ltd, England, 2008) was used to provide relative risk (RR) values and Yate’s corrected  $\chi^2$  test computations.

The 90 days cumulative survival probabilities of unjustified mortality related to severe sepsis were estimated by Kaplan-Meier method. Survival curves among patients with different types of severe sepsis were created individually based on their diabetes status. The log-rank test was used to compare the significance of inequality with respect to the diabetes status curves. Cox proportional hazards models were performed for all types of the hazard ratios in relation to severe sepsis with diabetes; these were adjusted for sex, age, number of comorbid conditions, number of organ failures, and surgery status.

**Table 5.** Multiple logistic regression analysis to predict the occurrence of mortality based on diabetes, gender, age group, Charlson comorbidities index and number of organ failure.

|                   | Coefficient (b) | Odds ratio | 95% CI      | P value |
|-------------------|-----------------|------------|-------------|---------|
| DM vs. non-DM     | -0.0288         | 0.972      | 0.890–1.061 | 0.5203  |
| Male sex          | 0.2614          | 1.299      | 1.198–1.408 | <.0001  |
| Age group         |                 |            |             |         |
| <50               | Reference       |            |             |         |
| 50–60             | 0.00308         | 1.003      | 0.850–1.184 | 0.9709  |
| 60–70             | -0.2081         | 0.812      | 0.698–0.945 | 0.0070  |
| 70–80             | -0.0208         | 0.979      | 0.859–1.117 | 0.7568  |
| >80               | 0.2561          | 1.292      | 1.136–1.470 | <.0001  |
| CCI               |                 |            |             |         |
| Low(0–2)          | Reference       |            |             |         |
| Moderate(3–4)     | 0.4786          | 1.614      | 1.471–1.771 | <.0001  |
| High(>= 5)        | 0.6351          | 1.887      | 1.699–2.096 | <.0001  |
| Organ Dysfunction |                 |            |             |         |
| 1                 | Reference       |            |             |         |
| 2                 | 0.9293          | 2.533      | 2.334–2.749 | <.0001  |
| ≥3                | 1.3850          | 3.995      | 3.483–4.582 | <.0001  |

95% CI: 95% confidence interval; DM: diabetes mellitus; CCI: Charlson-Deyo comorbidities index score. To avoid double-counting, diabetes mellitus was excluded from the CCI score in the diabetic cohort.  
doi:10.1371/journal.pone.0050729.t005

**Table 6.** Previous published works comparing the outcomes particularly the mortality rate between diabetics and nondiabetics with sepsis or severe infection.

| Authors             | Published year | Mortality rate (DM vs. non-DM)                                                                                                                                                                                                    | Study Settings                                                                                                                                                |
|---------------------|----------------|-----------------------------------------------------------------------------------------------------------------------------------------------------------------------------------------------------------------------------------|---------------------------------------------------------------------------------------------------------------------------------------------------------------|
| Carton JA et al.    | 1992           | Overall mortality and bacteremia-related mortality were similar in both groups.                                                                                                                                                   | Prospective study of all adult pts with bacteremia admitted to a large Spanish teaching hospital                                                              |
| Kornum JB et al.    | 2007           | Mortality among diabetic pts was greater than that among other pts: 19.9 vs. 15.1% after 30 days and 27.0 vs. 21.6% after 90 days, corresponding to adjusted 30- and 90-day MRRs of 1.16 (95% CI 1.07–1.27) and 1.10 (1.02–1.18). | Population-based cohort study of adults with a first-time hospitalization for pneumonia                                                                       |
| Moutzouri AG et al  | 2008           | The mortality in non-diabetic septic pts was 22.5% and in septic diabetics was 34.3%.                                                                                                                                             | 40 pts suffering from severe sepsis, 12 pts suffering from diabetes and 24 diabetic pts with severe sepsis were enrolled.                                     |
| Stoeckle M et al    | 2008           | In-hospital mortality rate was similar in the two groups (18% vs. 14%).                                                                                                                                                           | During a 4-year period 71 diabetic and 252 non-diabetics with bloodstream infection were included.                                                            |
| Esper AM et al.     | 2009           | People with DM were less likely to develop acute respiratory failure (9% vs. 14%, $p < 0.05$ ) and more likely to develop acute renal failure (13% vs. 7%, $p < 0.05$ ).                                                          | Using the National Hospital Discharge Survey US, sepsis cases from 1979 to 2003 were integrated with DM prevalence from the CDC Diabetes Surveillance System. |
| Kofteridis DP et al | 2009           | People with DM had longer fever (median 4.5 vs 2.5 days; $P < .001$ ), longer hospitalization (median 10 vs 7 days; $P < .001$ ), and greater mortality (12.5% vs 2.5%; $P < .01$ ) than controls.                                | 88 pts aged 65 and older with DM and 118 controls without DM, matched for age and sex, hospitalized with acute pyelonephritis                                 |
| Peralta G et al.    | 2009           | Mortality among diabetic and non-diabetic pts was not different [7.2% vs. 8.2%, RR 1.13; 95% CI (0.67–1.9); $p = 0.39$ ].                                                                                                         | Retrospective cohort study to investigate prognosis in pts with Enterobacteriaceae bacteremia.                                                                |
| Stegenga ME et al   | 2010           | Mortality was equal in diabetic and nondiabetic pts (31.4% vs. 30.5% after 28 days).                                                                                                                                              | Retrospective analysis of a previously published study.                                                                                                       |
| Schuetz P et al.    | 2011           | The mortality rate was 4.3% (95% CI 3.9% to 4.8%) and similar in diabetic and nondiabetic pts (4.1% versus 4.4%; absolute risk difference 0.4%; 95% CI –0.7% to 1.4%).                                                            | 3 independent, observational, prospective cohorts from Emergency Department pts with sepsis from 2 large US tertiary care centers                             |
| Chang C et al       | This study     | Diabetic pts with severe sepsis complicated with acute organ dysfunction do not fare worse with an adjusted HR of 0.979 (0.908–1.055).                                                                                            | Nationwide population-based retrospective cohort study in pts with severe sepsis requiring ICU admission                                                      |

CI: confidence interval; DM: diabetes mellitus; HR: hazard ratio; ICU: intensive care unit; Pts: patients.  
doi:10.1371/journal.pone.0050729.t006

Our results were used to construct a multiple logistic regression model to predict the occurrence of mortality,  $Y$ , based upon the following five explanatory variables: diabetes,  $X_1$ , gender,  $X_2$ , age group,  $X_3$ , Charlson-Deyo comorbidities index score,  $X_4$ , and number of organ failure,  $X_5$ . The 95% confidence interval (95% CI) for the estimated odds ratio (OR) was then calculated.

## Results

In the one-million representative sample of the National Health Insurance of Taiwan consisting complete corresponding registration and claim data, there were 1,415,162 hospitalizations from 1996 through 2008 among which there were 134,458 ICU admissions. We then identified 34,556 patients with severe sepsis during the period from 1998 to 2008 after excluding patients who had had sepsis in the preceding two years and cases with missing data. From this pool of patients, we identified 16,497 patients with severe sepsis who had been admitted to the ICU for the first time. These patients were then separated into a diabetes cohort ( $n = 4573$ ) and a non-diabetic control group ( $n = 11924$ ). Both groups of patients were then studied with respect to their characteristics, acute organ dysfunction, length of hospital stay (LOS), resource utilization in the ICU and followed up till discharge or death (Fig. 1).

## Demographic Characteristics

The mean age of the diabetic patients was 71.6 years, which is statistically significantly older than that of the non-diabetic patients, 67.6 years ( $p < 0.0001$ ). Male patients accounted for 53.84% of all diabetic patients whereas male patients account for 64.16% of the non-diabetic patients. In terms of co-morbidities, both groups showed no statistical difference in the Charlson-Deyo comorbidities index score (2.13 vs. 1.98,  $p > 0.9999$  Mann-Whitney U test). Both groups were balanced in terms of surgical conditions and having malignant neoplasm (cancer) (14.63% vs. 14.45%) (Table 1). Diabetic patients had more infections of the genitourinary tract (26.09% vs. 16.25%), gastrointestinal tract (34.53% vs. 32.58%), and skin, soft tissue and bone (19.07% vs. 12.00%) when their sites of infection were compared (Table 1).

In this Taiwanese population-based study, a higher percentage of non-diabetic patients with severe sepsis who were admitted to an ICU were mechanically ventilated, 76.16% of diabetic patients vs. 78.83% of non-diabetic patients ( $p = 0.0002$ ). As compared with the non-diabetic patients, diabetic patients more frequently underwent urinary catheterization (72.86% vs. 69.33%,  $p < 0.0001$ ) and hemodialysis (15.55% vs. 7.24%,  $p < 0.0001$ ) and to lesser extent, percutaneous nephrostomy (0.59% vs. 0.35%,  $p = 0.0469$ ). Whereas, non-diabetic patients in this cohort study



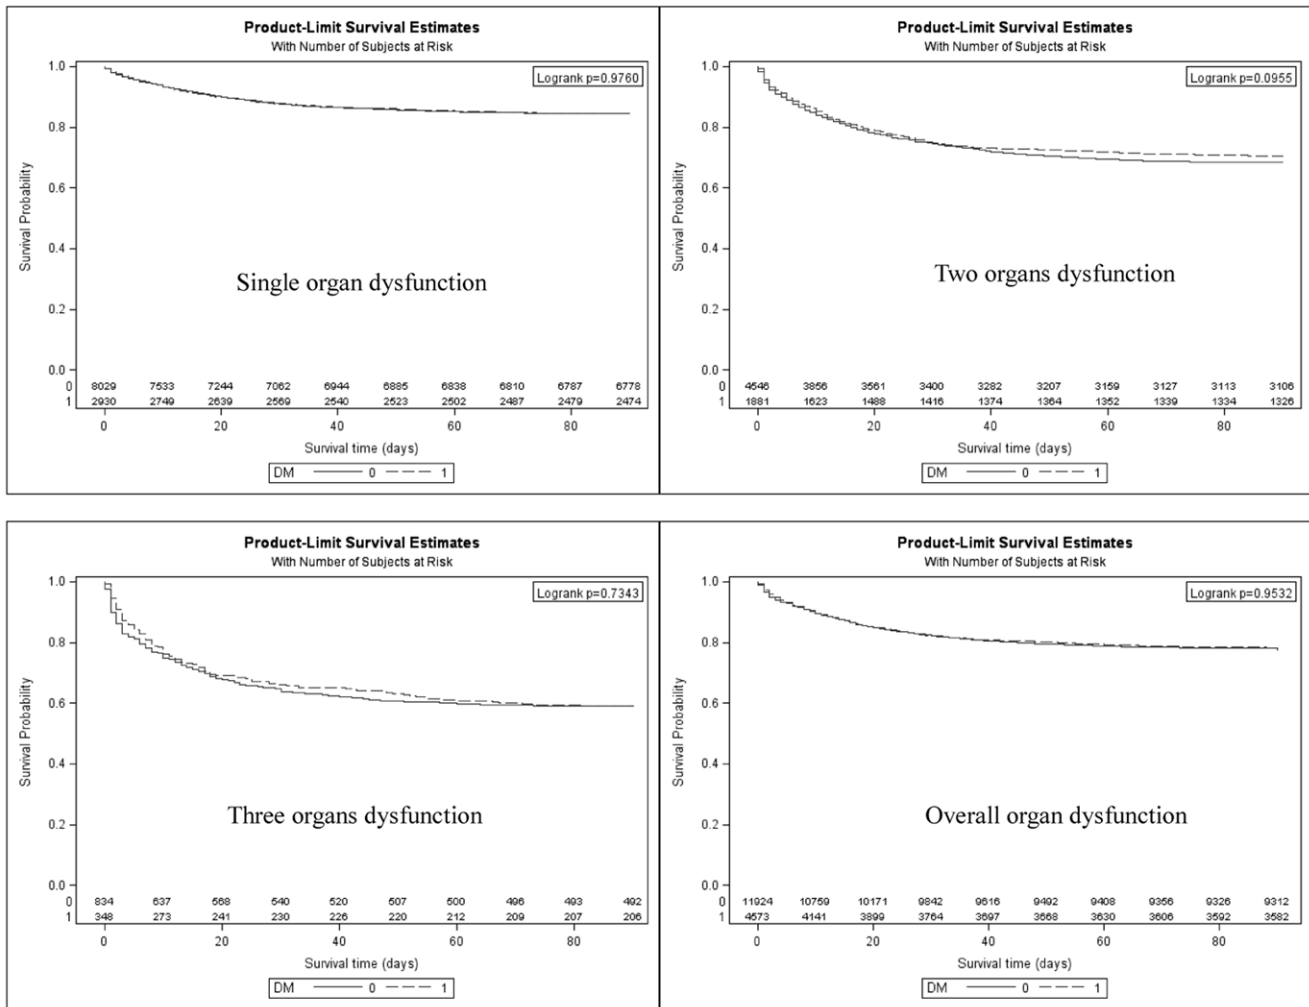

**Figure 3. Kaplan-Meier survival curves in diabetic and non-diabetic patients with severe sepsis by number involvement of organ dysfunction. Log-rank test was used for comparing their survival.**  
doi:10.1371/journal.pone.0050729.g003

were slightly more likely to have a chest tube insertion procedure (4.39% vs. 3.48%,  $p = 0.0098$ ). These ICU resource utilizations may reflect that acute kidney injury requiring hemodialysis is more frequently observed in the diabetic patients with severe sepsis.

**Risk of Acute Organ Dysfunction(s) by Diabetes Status**

Diabetic patients with severe sepsis who were admitted to an ICU had an increased relative risk (RR) of getting acute kidney injury (RR = 1.54, 95% CI, 1.44–1.63). Other than acute kidney injury, it is interesting to note that diabetic patients had a decreased relative risk of developing respiratory organ dysfunction (RR = 0.96, 95% CI, 0.94–0.97), hematological dysfunction, such as secondary thrombocytopenia, unspecified thrombocytopenia, other coagulation defects or defibrillation syndrome, (RR = 0.70, 95% CI, 0.56–0.89) and hepatic organ dysfunction (RR = 0.77, 95% CI, 0.63–0.93) (Table 2). The only increased RR is that of acute kidney injury. The rates are 27.14% for diabetic patients with sepsis and acute kidney injury as compared to 17.68% for the non-diabetic cohort (Table 2). Our results also show that 15.55% of diabetes group with severe sepsis underwent hemodialysis; this is much higher than the rate of 7.24% found for non-diabetic subjects ( $p < 0.0001$ ). However in terms of the HR for hospital

mortality rate, the group with acute kidney injury was found to have a lower risk of 0.795 (0.691–0.914). After adjustment made for age group, gender, Charlson-Deyo comorbidity index, surgical condition and number of acute organ dysfunctions, the adjusted HR became non-significant (aHR = 0.871, 95% CI 0.754–1.005).

**90-days in-hospital mortality and Cox proportional hazard model**

Diabetic patients with severe sepsis who had acute organ dysfunction do not fare worse than non-diabetic patients in terms of hospital mortality rate, 22.61% vs. 22.59%, or relative risk = 1.00 (95% CI = 0.94–1.07) (Table 2). Patients with diabetes complicated with acute organ dysfunction across the board also do not fare worse as evidenced by the unadjusted hazard ratio (HR) (Table 3). After adjusting for age group, gender, Charlson-Deyo comorbidities index, surgical condition, and number of organ dysfunctions, the diabetic patients had a significantly lower HR for death (did not fare worse) depending on type of acute organ dysfunction (Fig. 2). These were an adjusted HR = 0.952 (95% CI, 0.848–1.067) for cardiovascular organ dysfunction, an adjusted HR = 1.020 (0.942–1.105) for respiratory organ dysfunction, an adjusted HR = 1.008 (0.654–1.552) for hepatic dysfunction, an



adjusted HR = 0.871 (0.754–1.005) for acute kidney injury and an adjusted HR = 0.763 (0.473–1.231) for acute neurological dysfunction (Table 3, Figure 2). In terms of number of organ dysfunctions, the patients with diabetes also did not fare worse than non-diabetics with an adjusted HR for death of 0.979 (0.908–1.055) for the groups with overall organ dysfunction, an adjusted HR = 1.001 (0.898–1.117) for single organ dysfunction, an adjusted HR = 0.929 (0.825–1.045) for two-organ dysfunction and an adjusted HR = 1.086 (0.879–1.342) for groups with  $\geq 3$  organ dysfunction (Figure 3). As a whole, patients with diabetes who had complications due to acute organ dysfunction did not fare worse, with an adjusted HR of 0.979 (0.908–1.055), after an adjustment was made for age group, gender, Charlson-Deyo comorbidity index and number of organ dysfunctions (Table 3).

### Length of stay (LOS)

Both the mean and median days of stay per ICU hospitalization and interquartile range (IQR) of the LOS of the two cohorts showed no statistically significant difference ( $p = 0.11$ ) (Table 4). The mean LOS was approximately 24 days in both cohorts and the median LOS was 17 days for diabetic patients versus 16 days for non-diabetic patients.

### Multiple Logistic Regression Model to Predict Occurrence of Death

In a multiple logistic regression analysis to predict in-hospital death based on diabetes mellitus status, gender, age group, Charlson-Deyo comorbidity index in the low, moderate or high score groups, and number of organ dysfunctions, diabetes status does not result in an increased probability of death with an odds ratio (OR), 0.972 (95% CI = 0.890–1.061),  $p = 0.5203$  (Table 5). The independent predictive factors for in-hospital mortality in this model are male sex, OR 1.299 (1.198–1.408), an older age group (60–70 years, OR 0.812 (0.698–0.954); older than 80, OR 1.292 (1.136–1.470)), a higher CCI score group (moderate (score 3–4), OR 1.614 (1.471–1.771); high ( $\geq 5$ ), OR 1.887 (1.699–2.096)), and having more than one organ dysfunction (two-organ-dysfunction, OR 2.533 (2.334–2.749);  $\geq 3$ -organ-dysfunction, OR 3.995 (3.483–4.582)). However, the 60–70 year age group had a lower risk, namely an OR of 0.8 (0.698–0.945). Thus diabetes mellitus status does not predict patient mortality outcome based on the present multiple logistic regression analysis.

### Discussion

This is the first report utilizing a nationwide population-based follow-up study design that explores the issue of whether diabetes has negative impact on the outcome of severe sepsis. Previous studies examining this relationship have narrowed down certain specific aspects, such as concentrating on certain types of single organ failure or using a specific care setting such as the Emergency Room [6,8,16,17,19,31]. Morbidity from diabetes is a consequence of both microvascular disease (retinopathy, nephropathy, and neuropathy) and macrovascular disease (atherosclerosis), and therefore organ dysfunctions are often inter-related. In these circumstances a population-based study is likely to be more convincing as it will examine more types of organ dysfunctions following the occurrence of severe sepsis. Table 6 lists all published research in this area that to our knowledge compares the outcomes, particularly mortality rate, between diabetics and non-diabetics with sepsis or severe infection including pneumonia and enterobacterial bacteremia (Table 6).

The diabetic and non-diabetic cohorts in this study were balanced at the time of first-episode ICU admission in terms of

surgical conditions ( $p = 0.4554$ ), Charlson-Deyo comorbidity index score ( $p > 0.9999$ ) and the presence of malignant neoplasm ( $p = 0.7884$ ) (Table 1). This may simply reflect that the two cohorts were adequately sampled from the general population by this nationwide population-based study. Since the definition of diabetes mellitus in this study is well-defined, misclassification bias is not a concern. Another possible concern with cohort studies is loss to follow-up, which was not present in this study design because every subject was followed up until death as an outcome or discharge from the hospital.

In a manner that echoes a number of prior published reports concerning the reduced risk of acute respiratory failure in diabetic patients as compared with non-diabetic patients [16,19,31], this study confirms this finding. The relative risk of developing acute respiratory dysfunction is statistically lower at 0.96 (95% CI, 0.94–0.97). Moreover, the adjusted HR for 90-days hospital mortality in patients with acute respiratory dysfunction at 1.020 (95% CI, 0.942–1.105) shows that the overall risks are similar in the diabetic and non-diabetic groups (Fig. 3). One of the postulated mechanisms by which the rate of acute respiratory dysfunction is affected is via reduced neutrophil bactericidal activity, impaired neutrophil chemotaxis and lower leukotriene B<sub>4</sub> production by neutrophils as well as lower levels of superoxide production, which results in the diabetic patient suffering less oxidative damage [10,19,32,33,34]. Medications such as antidiabetic agents and insulin may also contribute to this protective effect [35,36,37]. In a preclinical animal study, rosiglitazone, a potent agonist of the peroxisome proliferator-activated receptor (PPAR)- $\gamma$ , was found to exert anti-inflammatory effects both *in vitro* and *in vivo* that significantly reduces endotoxin-induced acute lung injury in rats [37].

Interestingly, in addition to acute respiratory organ dysfunction, the diabetic cohort in this study also have a lower risk of developing hepatic (RR = 0.77, 0.63–0.93) and hematological (RR = 0.70, 0.56–0.89) organ dysfunction (Table 2). This study is the first report to pinpoint such relationships.

The only increased RR is that of acute kidney injury, however in terms of the HR for hospital mortality rate, the group with acute kidney injury was found to have a lower risk of 0.795 (0.691–0.914). After adjustment made for age group, gender, Charlson-Deyo comorbidity index, surgical condition and number of acute organ dysfunctions, the adjusted HR became non-significant (aHR = 0.871, 95% CI 0.754–1.005). Similar to this finding, Esper et al's epidemiological study indicated that subjects with diabetes and sepsis were more likely to develop acute kidney injury when compared to non-diabetics (13% vs. 7%,  $p < 0.05$ ) and were also less likely to develop acute respiratory failure (9% vs. 14%,  $p < 0.05$ ) [16].

The risk for mortality was statistically significantly increased in male patients (OR 1.3), patients aged older than 80 years (OR 1.3), patients with a higher CCI score of greater than 2 (OR 1.6 for moderate score group and 1.9 for high score group) and patients having more than one acute organ dysfunction (OR 2.5 for 2 organ dysfunction and 4.0 for  $\geq 3$  organ dysfunction). However, the 60–70 year age group had a lower risk, namely an OR of 0.8 (0.698–0.945). Thus diabetes mellitus status does not predict patient mortality outcome based on the present multiple logistic regression analysis.

This is the first nationwide, population-based study to examine the effect of diabetes on the outcome risk for severe sepsis requiring ICU admission. This study has a number of strengths. These include, firstly, the use of a previously validated population-based dataset that enables the complete follow-up of both cohorts with no drop-out or intentional exclusion from the final analysis.

Secondly, the use of a large sample size that allows a considerable statistical advantage when detecting real differences between the diabetic and non-diabetic cohorts. Nevertheless, this study still has some limitations. In this context, the major and most obvious limitation is that some patient information, such as cigarette smoking, alcohol consumption and glycated hemoglobin HbA1c level, as well as a detailed bacteriological or fungal pathogen analysis, were not available through the administrative dataset. Through this nationwide population-based study of Taiwanese patients with severe sepsis who required ICU medical care, it was found that diabetes status does not influence the subsequent outcome with respect to either hospital mortality or length of hospital stay. Interestingly, diabetic cohorts seem to have a lower risk of developing acute respiratory dysfunction, acute hepatic dysfunction and hematological dysfunction.

## Interpretation

This is the first report utilizing a nationwide population-based follow-up study design that provides further strong evidence to refute the arguments for diabetes has negative impact on the outcome of severe sepsis. This study is also the first report to pinpoint such relationships as the diabetic cohort has a lower risk

of developing acute hepatic and hematological organ dysfunction. The limitations in this study is that some patient information, such as cigarette smoking, alcohol consumption and glycated hemoglobin level, HbA1c level, as well as a detailed bacteriological or fungal pathogen analysis were not available through the administrative dataset. Future research should focus on examining the association between certain antidiabetic agent and the outcome of severe sepsis.

## Acknowledgments

We are immensely thankful to the Bureau of National Health Insurance, Department of Health, and National Health Research Institutes for kindly providing the raw data for analysis. The interpretation and conclusions contained herein do not represent those of the Bureau of National Health Insurance, Department of Health, or National Health Research Institutes, Taiwan.

## Author Contributions

Conceived and designed the experiments: CC VCK. Performed the experiments: CC VCK. Analyzed the data: VCK CC TT JH CL. Contributed reagents/materials/analysis tools: CC VCK TT JH CL. Wrote the paper: VCK CC. Acquired funding for this study: CC.

## References

- Angus DC, Linde-Zwirble WT, Lidicker J, Clermont G, Carcillo J, et al. (2001) Epidemiology of severe sepsis in the United States: analysis of incidence, outcome, and associated costs of care. *Crit Care Med* 29: 1303–1310.
- Yang Y, Yang KS, Hsann YM, Lim V, Ong BC (2010) The effect of comorbidity and age on hospital mortality and length of stay in patients with sepsis. *J Crit Care* 25: 398–405.
- Beale R, Reinhart K, Brunkhorst FM, Dobb G, Levy M, et al. (2009) Promoting Global Research Excellence in Severe Sepsis (PROGRESS): lessons from an international sepsis registry. *Infection* 37: 222–232.
- O'Brien JM Jr, Lu B, Ali NA, Martin GS, Aberegg SK, et al. (2007) Alcohol dependence is independently associated with sepsis, septic shock, and hospital mortality among adult intensive care unit patients. *Crit Care Med* 35: 345–350.
- Poutsiaika DD, Davidson LE, Kahn KL, Bates DW, Snyderman DR, et al. (2009) Risk factors for death after sepsis in patients immunosuppressed before the onset of sepsis. *Scand J Infect Dis* 41: 469–479.
- Schuetz P, Jones AE, Howell MD, Trzeciak S, Ngo L, et al. (2011) Diabetes is not associated with increased mortality in emergency department patients with sepsis. *Ann Emerg Med* 58: 438–444.
- Stegenga ME, Vincent JL, Vail GM, Xie J, Haney DJ, et al. (2010) Diabetes does not alter mortality or hemostatic and inflammatory responses in patients with severe sepsis. *Crit Care Med* 38: 539–545.
- Kornum JB, Thomsen RW, Riis A, Lervang HH, Schonheyder HC, et al. (2007) Type 2 diabetes and pneumonia outcomes: a population-based cohort study. *Diabetes Care* 30: 2251–2257.
- Benfield T, Jensen JS, Nordestgaard BG (2007) Influence of diabetes and hyperglycaemia on infectious disease hospitalisation and outcome. *Diabetologia* 50: 549–554.
- Luo B, Chan WF, Lord SJ, Nanji SA, Rajotte RV, et al. (2007) Diabetes induces rapid suppression of adaptive immunity followed by homeostatic T-cell proliferation. *Scand J Immunol* 65: 22–31.
- Schuetz P, Yano K, Sorasaki M, Ngo L, St Hilaire M, et al. (2011) Influence of diabetes on endothelial cell response during sepsis. *Diabetologia* 54: 996–1003.
- Dandona P, Aljada A, Chaudhuri A, Mohanty P (2004) Endothelial dysfunction, inflammation and diabetes. *Rev Endocr Metab Disord* 5: 189–197.
- Moutzouri AG, Athanassiou GA, Dimitropoulou D, Skoutelis AT, Gogos CA (2008) Severe sepsis and diabetes mellitus have additive effects on red blood cell deformability. *J Infect* 57: 147–151.
- Carton JA, Maradona JA, Nuno FJ, Fernandez-Alvarez R, Perez-Gonzalez F, et al. (1992) Diabetes mellitus and bacteraemia: a comparative study between diabetic and non-diabetic patients. *Eur J Med* 1: 281–287.
- Stoeckle M, Kaech C, Trampuz A, Zimmerli W (2008) The role of diabetes mellitus in patients with bloodstream infections. *Swiss Med Wkly* 138: 512–519.
- Esper AM, Moss M, Martin GS (2009) The effect of diabetes mellitus on organ dysfunction with sepsis: an epidemiological study. *Crit Care* 13: R18.
- Peralta G, Sanchez MB, Roiz MP, Garrido JC, Teira R, et al. (2009) Diabetes does not affect outcome in patients with Enterobacteriaceae bacteremia. *BMC Infect Dis* 9: 94.
- Yende S, van der Poll T (2009) Diabetes and sepsis outcomes - it is not all bad news. *Critical Care* 13: 117.
- Yang Y, Salam ZH, Ong BC, Yang KS (2011) Respiratory dysfunction in patients with sepsis: protective effect of diabetes mellitus. *Am J Crit Care* 20: e41–47.
- Shen HN, Lu CL, Li CY (2012) Effect of diabetes on severity and hospital mortality in patients with acute pancreatitis: a national population-based study. *Diabetes Care* 35: 1061–1066.
- Shau WY, Shao YY, Yeh YC, Lin ZZ, Kuo R, et al. (2012) Diabetes mellitus is associated with increased mortality in patients receiving curative therapy for hepatocellular carcinoma. *Oncologist* 17: 856–862.
- Luo JC, Leu HB, Huang KW, Huang CC, Hou MC, et al. (2011) Incidence of bleeding from gastroduodenal ulcers in patients with end-stage renal disease receiving hemodialysis. *CMAJ* 183: E1345–1351.
- Cheng CL, Kao YH, Lin SJ, Lee CH, Lai ML (2011) Validation of the National Health Insurance Research Database with ischemic stroke cases in Taiwan. *Pharmacoepidemiol Drug Saf* 20: 236–242.
- Lai JN, Wu CT, Chen PC, Huang CS, Chow SN, et al. (2011) Increased risk for invasive breast cancer associated with hormonal therapy: a nation-wide random sample of 65,723 women followed from 1997 to 2008. *PLoS One* 6: e25183.
- Martin GS, Mannino DM, Eaton S, Moss M (2003) The epidemiology of sepsis in the United States from 1979 through 2000. *N Engl J Med* 348: 1546–1554.
- Shen HN, Lu CL, Yang HH (2010) Epidemiologic trend of severe sepsis in Taiwan from 1997 through 2006. *Chest* 138: 298–304.
- Lin CC, Lai MS, Syu CY, Chang SC, Tseng FY (2005) Accuracy of diabetes diagnosis in health insurance claims data in Taiwan. *Journal of the Formosan Medical Association* 104: 157–163.
- Chang CH, Shau WY, Jiang YD, Li HY, Chang TJ, et al. (2010) Type 2 diabetes prevalence and incidence among adults in Taiwan during 1999–2004: a national health insurance data set study. *Diabetic medicine: a journal of the British Diabetic Association* 27: 636–643.
- Charlson ME, Pompei P, Ales KL, MacKenzie CR (1987) A new method of classifying prognostic comorbidity in longitudinal studies: Development and validation. *Journal of Chronic Diseases* 40: 373–383.
- Deyo RA, Cherkin DC, Ciol MA (1992) Adapting a clinical comorbidity index for use with ICD-9-CM administrative databases. *J Clin Epidemiol* 45: 613–619.
- Moss M, Guidot DM, Steinberg KP, Duhon GF, Treece P, et al. (2000) Diabetic patients have a decreased incidence of acute respiratory distress syndrome. *Crit Care Med* 28: 2187–2192.
- Delamaire M, Maugeudre D, Moreno M, Le Goff MC, Allanic H, et al. (1997) Impaired leucocyte functions in diabetic patients. *Diabet Med* 14: 29–34.
- Jubiz W, Draper RE, Gale J, Nolan G (1984) Decreased leukotriene B4 synthesis by polymorphonuclear leukocytes from male patients with diabetes mellitus. *Prostaglandins Leukot Med* 14: 305–311.
- Perner A, Nielsen SE, Rask-Madsen J (2003) High glucose impairs superoxide production from isolated blood neutrophils. *Intensive Care Med* 29: 642–645.
- Almog Y, Shefer A, Novack V, Maimon N, Barski L, et al. (2004) Prior statin therapy is associated with a decreased rate of severe sepsis. *Circulation* 110: 880–885.
- Fraker DL, Merino MJ, Norton JA (1989) Reversal of the toxic effects of cachectin by concurrent insulin administration. *American Journal of Physiology - Endocrinology And Metabolism* 256: E725–E731.
- Liu D, Zeng BX, Zhang SH, Wang YL, Zeng L, et al. (2005) Rosiglitazone, a peroxisome proliferator-activated receptor-gamma agonist, reduces acute lung injury in endotoxemic rats. *Crit Care Med* 33: 2309–2316.
